# Supplementary material for: Social network community structure and the contact-mediated sharing of commensal E. coli among captive rhesus macaques ( Macaca mulatta )
Source: PeerJ journal article supplement (doi:10.7717/peerj.4271), 2018-01-17

A

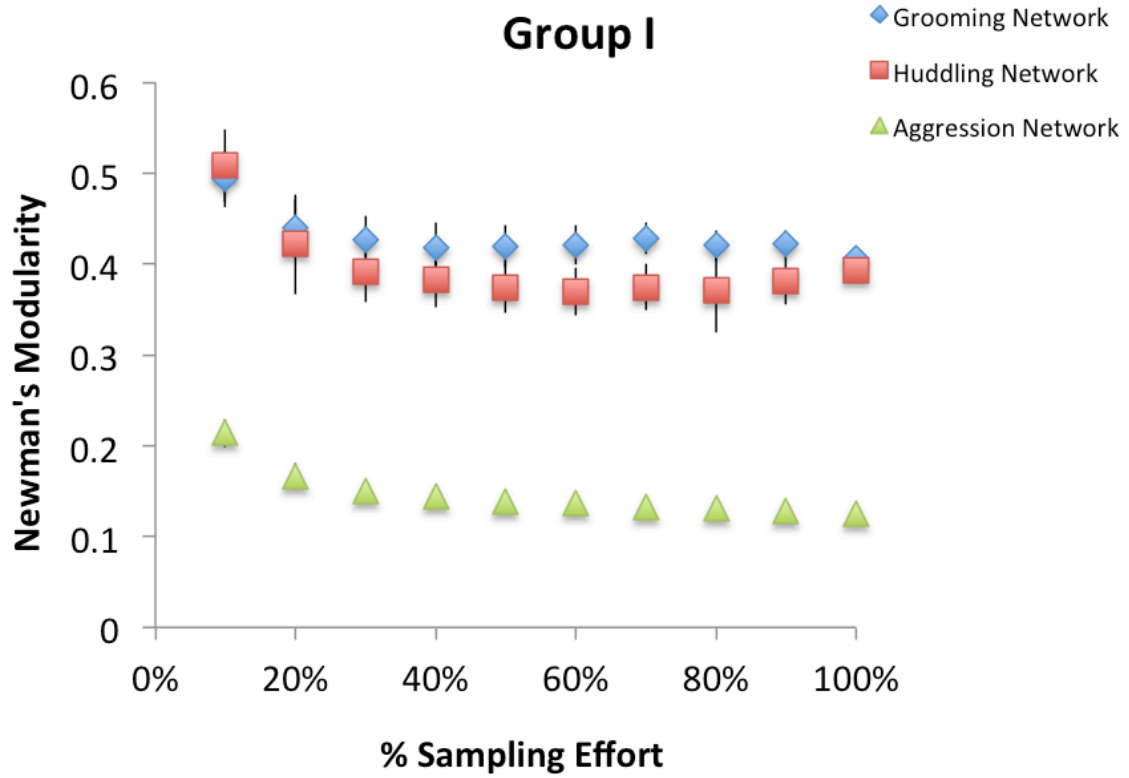

B

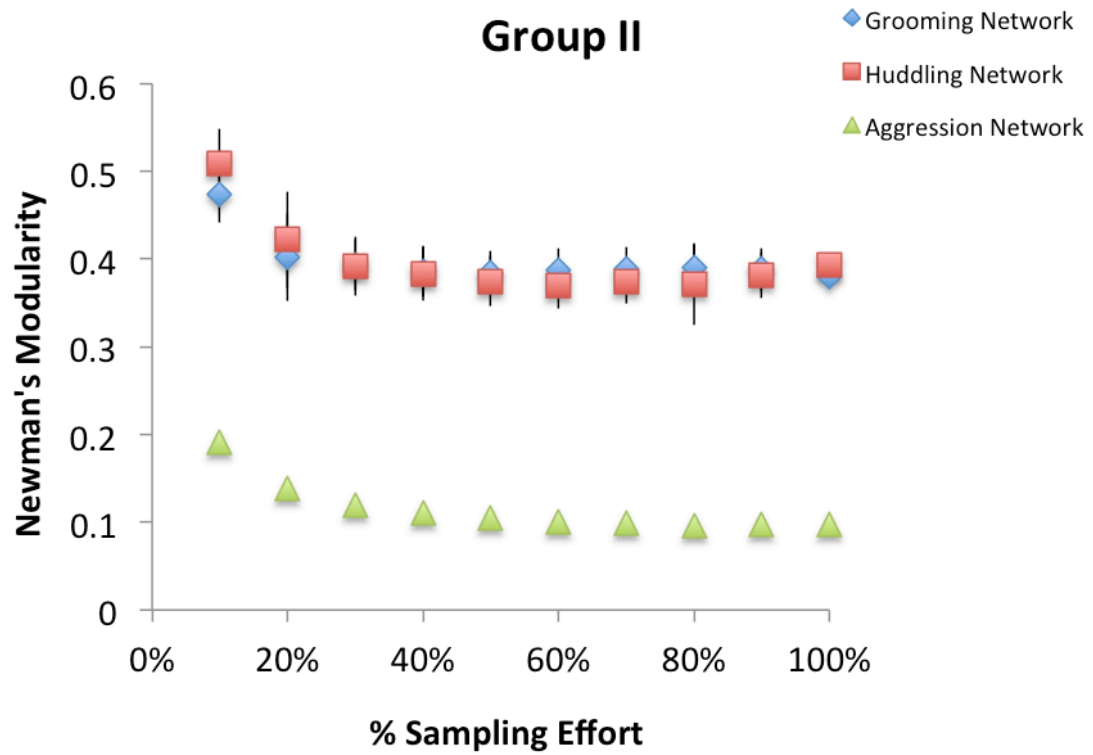

C

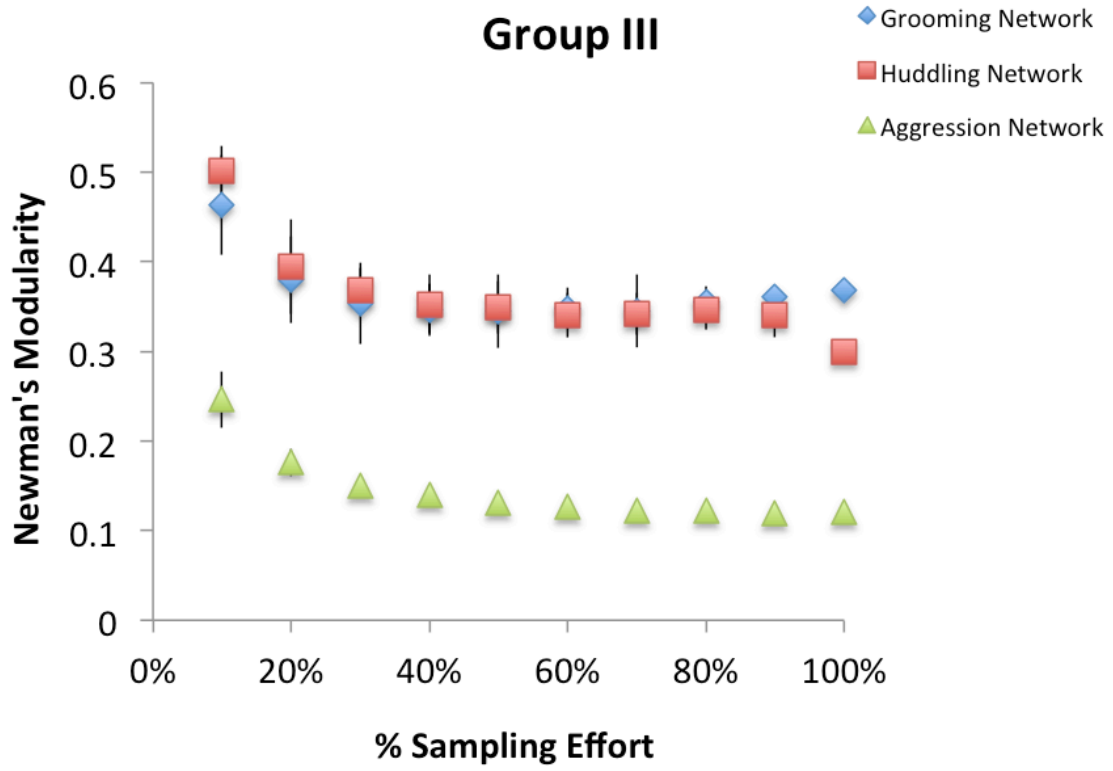

Supplement: Supplementary_Figure_1.pdf [file Supplementary_Figure_1.pdf]
